# Supplementary material for: The Incidence Risk for Primary Glaucoma and Its Subtypes following Chronic Exposure to Ionizing Radiation in the Russian Cohort of Mayak Nuclear Workers
Source: MDPI journal article supplement (doi:10.3390/cancers14030602), 2022-01-25
Supplement: s1 [file s1]

Supplementary Materials

# The Incidence Risk for Primary Glaucoma and Its Subtypes following Chronic Exposure to Ionizing Radiation in the Russian Cohort of Mayak Nuclear Workers

Tamara V. Azizova <sup>1,\*</sup>, Evgeny V. Bragin <sup>1</sup>, Maria V. Bannikova <sup>1</sup>, Nobuyuki Hamada <sup>2</sup>  
and Evgeniya S. Grigoryeva <sup>1</sup>

<sup>1</sup> Clinical Department, Southern Urals Biophysics Institute (SUBI), Ozyorsk 456780, Russia; bragin@subi.su (E.V.B.); bannikova@subi.su (M.V.B.); grig@subi.su (E.S.G.)

<sup>2</sup> Radiation Safety Unit, Biology and Environmental Chemistry Division, Sustainable System Research Laboratory, Central Research Institute of Electric Power Industry (CRIEPI), Tokyo 201–8511, Japan; hamada-n@criepi.denken.or.jp

\* Correspondence: clinic@subi.su

**Table S1.** Variables used in the model for analyses.

| Type           | Variable                      | Description          |                  |
|----------------|-------------------------------|----------------------|------------------|
| Fixed          | Sex                           | 1: Males             | 2: Females       |
| Fixed          | Period of hire                | 1: 1948–1953         | 4: 1964–1972     |
|                |                               | 2: 1954–1958         | 5: 1973–1978     |
|                |                               | 3: 1959–1963         | 6: 1979–1982     |
| Fixed          | Age at hire                   | 1: <30               | 3: ≥40           |
|                |                               | 2: 30–40             |                  |
| Fixed          | Cohort of birth               | 1: <1910             | 4: 1930–1939     |
|                |                               | 2: 1910–1919         | 5: 1940–1949     |
|                |                               | 3: 1920–1929         | 6: ≥1950         |
| Fixed          | Smoking status                | 1: never smoker      | 3: smoker        |
|                |                               | 2: ever smoker       | 4: unknown       |
| Fixed          | Alcohol drinking habit status | 1: never-drinker     | 4: heavy-drinker |
|                |                               | 2: seldom-drinker    |                  |
|                |                               | 3: moderate-drinker  |                  |
| Fixed          | Arterial hypertension         | 1: unknown           |                  |
|                |                               | 2: hypertension-free |                  |
|                |                               | 3: hypertension      |                  |
| Fixed          | Body mass index               | 1: unknown           | 4: > normal      |
|                |                               | 2: < normal          | 5: obesity       |
|                |                               | 3: normal            |                  |
| Time-dependent | Attained age                  | 1: <40               | 7: 65–70         |
|                |                               | 2: 40–45             | 8: 70–75         |
|                |                               | 3: 45–50             | 9: 75–80         |
|                |                               | 4: 50–55             | 10: 80–85        |
|                |                               | 5: 55–60             | 11: ≥85          |
|                |                               | 6: 60–65             |                  |
| Time-dependent | Calendar period               | 1: 1946–1950         | 8: 1981–1985     |
|                |                               | 2: 1951–1955         | 9: 1986–1990     |
|                |                               | 3: 1956–1960         | 10: 1991–1995    |
|                |                               | 4: 1961–1965         | 11: 1996–2000    |
|                |                               | 5: 1966–1970         | 12: 2001–2005    |
|                |                               | 6: 1971–1975         | 13: 2006–2010    |
|                |                               | 7: 1976–1980         | 14: 2011–2015    |

|                |                                                                                                     |                                                                                                                                                                                                                                                                                                         |                                                          |
|----------------|-----------------------------------------------------------------------------------------------------|---------------------------------------------------------------------------------------------------------------------------------------------------------------------------------------------------------------------------------------------------------------------------------------------------------|----------------------------------------------------------|
|                |                                                                                                     | 15: 2016–2019                                                                                                                                                                                                                                                                                           |                                                          |
| Time-dependent | Smoking index                                                                                       | 1: 0<br>2: 0–10<br>3: 10–20                                                                                                                                                                                                                                                                             | 4: ≥20<br>5: unknown                                     |
| Time-dependent | Cataract before glaucoma was diagnosed                                                              | 1: cataract-free<br>2: diagnosed cataract                                                                                                                                                                                                                                                               |                                                          |
| Time-dependent | Cataract surgery before glaucoma was diagnosed                                                      | 1: cataract surgery free<br>2: cataract surgery                                                                                                                                                                                                                                                         |                                                          |
| Time-dependent | Diabetes mellitus (DM)                                                                              | 1: DM-free<br>2: DM                                                                                                                                                                                                                                                                                     |                                                          |
| Time-dependent | Brain absorbed gamma dose from external exposure (Gy), lagged for 0, 5, 10, 15, 20 years            | 1: 0–0.25<br>2: 0.25–0.5<br>3: 0.5–0.75<br>4: 0.75–1.00                                                                                                                                                                                                                                                 | 5: 1.00–1.25<br>6: 1.25–1.50<br>7: 1.50–2.00<br>8: ≥2.00 |
| Time-dependent | Brain absorbed neutron dose (Gy), lagged for 0, 5, 10, 15, 20 years                                 | 1: unmeasured<br>2: 0.00–0.0001<br>3: 0.0001–0.001<br>4: 0.001–0.0025                                                                                                                                                                                                                                   | 5: 0.0025–0.005<br>6: 0.005–0.01<br>7: ≥0.01             |
| Estimated      | Attained age                                                                                        | Person-years weighted by mean age (in years)                                                                                                                                                                                                                                                            |                                                          |
|                | Cumulative brain absorbed gamma dose from external exposure (Gy), lagged for 0, 5, 10, 15, 20 years | Person-years weighted by cumulative brain absorbed gamma dose lagged for 0, 5, 10, 15, 20 years                                                                                                                                                                                                         |                                                          |
|                | Cumulative brain absorbed neutron dose (Gy), lagged for 0, 5, 10, 15, 20 years                      | Person-years weighted by cumulative brain absorbed neutron dose lagged for 0, 5, 10, 15, 20 years                                                                                                                                                                                                       |                                                          |
|                | Person-years                                                                                        | at risk                                                                                                                                                                                                                                                                                                 |                                                          |
| Cases          |                                                                                                     | 1: POAG – primary open-angle glaucoma. (ICD-9 code 365.1)<br>2: HTG – high-tension glaucoma. (ICD-9 code 365.1 with high intraocular pressure)<br>3: NTG – normal-tension glaucoma. (ICD-9 code 365.1 with normal intraocular pressure)<br>4: PACG – primary angle-closure glaucoma. (ICD-9 code 365.2) |                                                          |

**Table S2.** Non-linear dose-responses for incidence of glaucoma in relation to cumulative brain absorbed gamma dose of external exposure.

|      | <b>LQ:</b><br>model parameters;<br><i>p</i> -value;<br><i>dev</i> L/ <i>dev</i> LQ | <b>LE:</b><br>model parameters;<br><i>p</i> -value;<br><i>dev</i> L/ <i>dev</i> LE  | <b>Q:</b><br>model parameters;<br>$\Delta$ AIC;<br><i>dev</i> L/ <i>dev</i> Q |
|------|------------------------------------------------------------------------------------|-------------------------------------------------------------------------------------|-------------------------------------------------------------------------------|
| POAG | $0.14 \cdot D - 0.03 \cdot D^2$<br><i>p</i> > 0.5<br>7157.308/7157.098             | $0.24 \cdot D \cdot \exp(-0.48 \cdot D)$<br><i>p</i> > 0.5<br>7157.308/7156.966     | $0.02 \cdot D^2$<br>$\Delta$ AIC = 0.487<br>7157.308/7157.795                 |
| HTG  | $0.12 \cdot D - 0.06 \cdot D^2$<br><i>p</i> = 0.22<br>6025.676 / 6024.156          | $-0.0006 \cdot D \cdot \exp(0.81 \cdot D)$<br><i>p</i> > 0.5<br>6025.676 / 6025.434 | $-0.03 \cdot D^2$<br>$\Delta$ AIC = 0.6<br>6025.676 / 6025.076                |
| NTG  | $0.41 \cdot D + 0.05 \cdot D^2$<br><i>p</i> > 0.5<br>1347.683/1347.625             | $0.35 \cdot D \cdot \exp(0.17 \cdot D)$<br><i>p</i> > 0.5<br>1347.683/1347.578      | $0.18 \cdot D^2$<br>$\Delta$ AIC = 0.492<br>1347.683/1348.175                 |
| PACG | $0.27 \cdot D - 0.08 \cdot D^2$<br><i>p</i> > 0.5<br>427.302/427.199               | $6.01 \cdot D \cdot \exp(-2.47 \cdot D)$<br><i>p</i> = 0.25<br>427.302/425.961      | $0.0001 \cdot D^2$<br>$\Delta$ AIC = 0.017<br>427.302/427.319                 |

POAG, primary open-angle glaucoma. HTG, high-tension glaucoma. NTG, normal-tension glaucoma. PACG, primary angle-closure glaucoma. LQ, linear-quadratic; LE, linear-exponential; Q, quadratic; dev, deviation; *p*-value, statistical significance of the difference compared to a linear mode;  $\Delta$ AIC, difference between Akaike information criteria for linear and quadratic models.
